# Supplementary material for: Cryo neutron crystallography demonstrates influence of RNA 2′-OH orientation on conformation, sugar pucker and water structure
Source: PubMed Central journal article supplement — Nucleic Acids Res. 2022 Jul 12;50(13):7721–38. doi: 10.1093/nar/gkac577 (PMC9303348; doi:10.1093/nar/gkac577), 2022-07-12
Supplement: gkac577_supplemental_file.pdf [file gkac577_supplemental_file.pdf]

## **SUPPORTING INFORMATION**

### **Cryo neutron crystallography demonstrates influence of RNA 2'-OH orientation on conformation, sugar pucker and water structure**

Joel M. Harp<sup>1,2</sup>, Terry Lybrand<sup>2,3</sup>, Pradeep S. Pallan<sup>1,2</sup>, Leighton Coates<sup>4</sup>, Brendan Sullivan<sup>4</sup> and Martin Egli<sup>1,2\*</sup>

<sup>1</sup>Department of Biochemistry, <sup>2</sup>Center for Structural Biology and <sup>3</sup>Department of Chemistry, Vanderbilt University, Nashville, Tennessee 37232, USA, and <sup>4</sup>Neutron Scattering Division, Oak Ridge National Laboratory, 1 Bethel Valley Road, Oak Ridge, Tennessee 37831, USA.

\*Correspondence, e-mail: martin.egli@vanderbilt.edu

**Table S1.** Neutron data statistics by resolution bin.

| d_max | d_min | #obs  | #uniq | mult. | %comp | <I>   | <I/sI> | r_mrg | r_meas | r_pim | cc1/2 |
|-------|-------|-------|-------|-------|-------|-------|--------|-------|--------|-------|-------|
| 13.80 | 4.68  | 1215  | 322   | 3.77  | 94.15 | 443.9 | 18.8   | 0.264 | 0.309  | 0.154 | 0.958 |
| 4.68  | 3.74  | 1599  | 329   | 4.86  | 97.92 | 228.0 | 19.0   | 0.392 | 0.437  | 0.188 | 0.628 |
| 3.74  | 3.28  | 1718  | 322   | 5.34  | 96.70 | 246.7 | 20.6   | 0.375 | 0.412  | 0.165 | 0.803 |
| 3.28  | 2.98  | 1755  | 317   | 5.54  | 94.63 | 152.5 | 15.9   | 0.444 | 0.481  | 0.178 | 0.652 |
| 2.98  | 2.77  | 1505  | 321   | 4.69  | 94.97 | 76.4  | 9.4    | 0.395 | 0.433  | 0.170 | 0.542 |
| 2.77  | 2.61  | 1310  | 301   | 4.35  | 90.12 | 50.4  | 6.5    | 0.298 | 0.329  | 0.133 | 0.715 |
| 2.61  | 2.48  | 1011  | 283   | 3.57  | 88.99 | 40.3  | 4.9    | 0.268 | 0.302  | 0.132 | 0.739 |
| 2.48  | 2.37  | 930   | 303   | 3.07  | 85.11 | 35.0  | 4.0    | 0.269 | 0.311  | 0.149 | 0.415 |
| 2.37  | 2.28  | 659   | 260   | 2.53  | 83.87 | 32.5  | 3.3    | 0.241 | 0.288  | 0.153 | 0.285 |
| 2.28  | 2.20  | 668   | 287   | 2.33  | 83.43 | 32.2  | 3.1    | 0.249 | 0.297  | 0.157 | 0.370 |
| 13.80 | 2.20  | 12370 | 3045  | 4.06  | 90.95 | 139.6 | 10.9   | 0.362 | 0.402  | 0.168 | 0.918 |

**Table S2.** X-ray data statistics by resolution bin.

| Resol. [Å]  | #Data | #Theory | %Compl. | Redundancy | Mean I | Mean I/s | Rmerge | Rsigma |
|-------------|-------|---------|---------|------------|--------|----------|--------|--------|
| 29.49- 4.04 | 531   | 565     | 94.0    | 14.42      | 136.73 | 54.53    | 0.0316 | 0.0220 |
| 4.04 - 2.71 | 1240  | 1260    | 98.4    | 15.84      | 127.48 | 55.85    | 0.0338 | 0.0205 |
| 2.71 - 2.15 | 1791  | 1791    | 100.0   | 15.75      | 36.00  | 51.81    | 0.0415 | 0.0179 |
| 2.15 - 1.88 | 1761  | 1763    | 99.9    | 15.77      | 22.68  | 47.75    | 0.0483 | 0.0186 |
| 1.88 - 1.70 | 1871  | 1873    | 99.9    | 15.64      | 15.21  | 43.85    | 0.0556 | 0.0197 |
| 1.70 - 1.58 | 1760  | 1760    | 100.0   | 15.46      | 11.25  | 38.68    | 0.0650 | 0.0215 |
| 1.58 - 1.49 | 1715  | 1715    | 100.0   | 14.95      | 6.09   | 30.43    | 0.0816 | 0.0271 |
| 1.49 - 1.41 | 1920  | 1920    | 100.0   | 15.22      | 4.18   | 25.24    | 0.0986 | 0.0326 |
| 1.41 - 1.35 | 1736  | 1736    | 100.0   | 15.18      | 3.34   | 21.73    | 0.1155 | 0.0386 |
| 1.35 - 1.30 | 1734  | 1734    | 100.0   | 14.96      | 2.90   | 19.01    | 0.1342 | 0.0444 |
| 1.30 - 1.25 | 2000  | 2000    | 100.0   | 14.70      | 2.78   | 17.41    | 0.1446 | 0.0485 |
| 1.25 - 1.21 | 1861  | 1861    | 100.0   | 14.18      | 2.59   | 15.44    | 0.1667 | 0.0546 |
| 1.21 - 1.18 | 1493  | 1493    | 100.0   | 13.91      | 2.15   | 13.11    | 0.1916 | 0.0653 |
| 1.18 - 1.15 | 1763  | 1763    | 100.0   | 12.47      | 1.80   | 10.64    | 0.2112 | 0.0832 |
| 1.15 - 1.12 | 1906  | 1906    | 100.0   | 12.57      | 1.46   | 9.23     | 0.2370 | 0.0995 |
| 1.12 - 1.09 | 2110  | 2110    | 100.0   | 12.24      | 1.16   | 7.45     | 0.2712 | 0.1251 |
| 1.09 - 1.07 | 1591  | 1591    | 100.0   | 11.97      | 0.93   | 6.02     | 0.3261 | 0.1574 |
| 1.07 - 1.05 | 1609  | 1609    | 100.0   | 11.85      | 0.80   | 5.27     | 0.3750 | 0.1819 |
| 1.05 - 1.03 | 1824  | 1824    | 100.0   | 11.42      | 0.61   | 4.07     | 0.4535 | 0.2407 |
| 1.03 - 1.01 | 1956  | 1956    | 100.0   | 10.92      | 0.51   | 3.37     | 0.5327 | 0.2948 |
| 1.01 - 1.00 | 1209  | 1269    | 95.3    | 7.34       | 0.43   | 2.28     | 0.6190 | 0.5141 |
| -----       |       |         |         |            |        |          |        |        |
| 1.10 - 1.00 | 8929  | 8989    | 99.3    | 10.96      | 0.69   | 4.45     | 0.4119 | 0.2284 |
| 29.49- 1.00 | 35381 | 35498   | 99.7    | 13.68      | 12.44  | 21.66    | 0.0546 | 0.0264 |

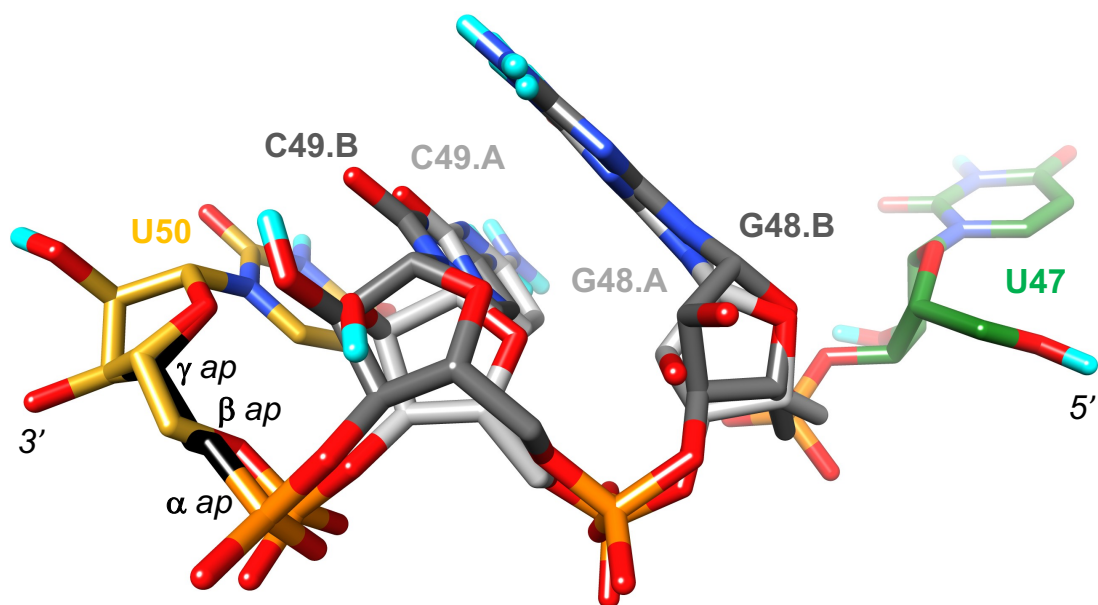

**Figure S1.** Residues G48 and C49 exhibit dual conformations termed A and B, with carbon atoms colored in light gray and dark gray, respectively. Backbone and glycosidic torsion angles fall into the same ranges in the two conformers (Table 3, main text), but the 2'-OH of C49.A has a phosphate orientation and the 2'-OH of C49.B has a base orientation. In U50, backbone torsion angles  $\alpha$  to  $\gamma$  associated with the A conformer fall into the standard ranges (*sc*-, *ap*, *sc*+). The backbone of the B conformer in that region adopts an extended orientation with all three angles exhibiting an *ap* conformation (highlighted with black bonds and labeled). Conformational disorder near strand termini, e.g. fraying of base pairs, is not uncommon in crystal structures of DNA and RNA. The extended backbone variant seen here in conformer B is a common feature in DNA and RNA A-form duplexes. It is possible that the orientation of the C49 2'-OH group is somehow involved in flipping the  $\alpha$  and  $\gamma$  backbone angles in U50 from *sc*-/*sc*+ to *ap*/*ap*. However, this single observation adjacent to a backbone region with twofold conformational disorder is not sufficient to draw a conclusion either way.

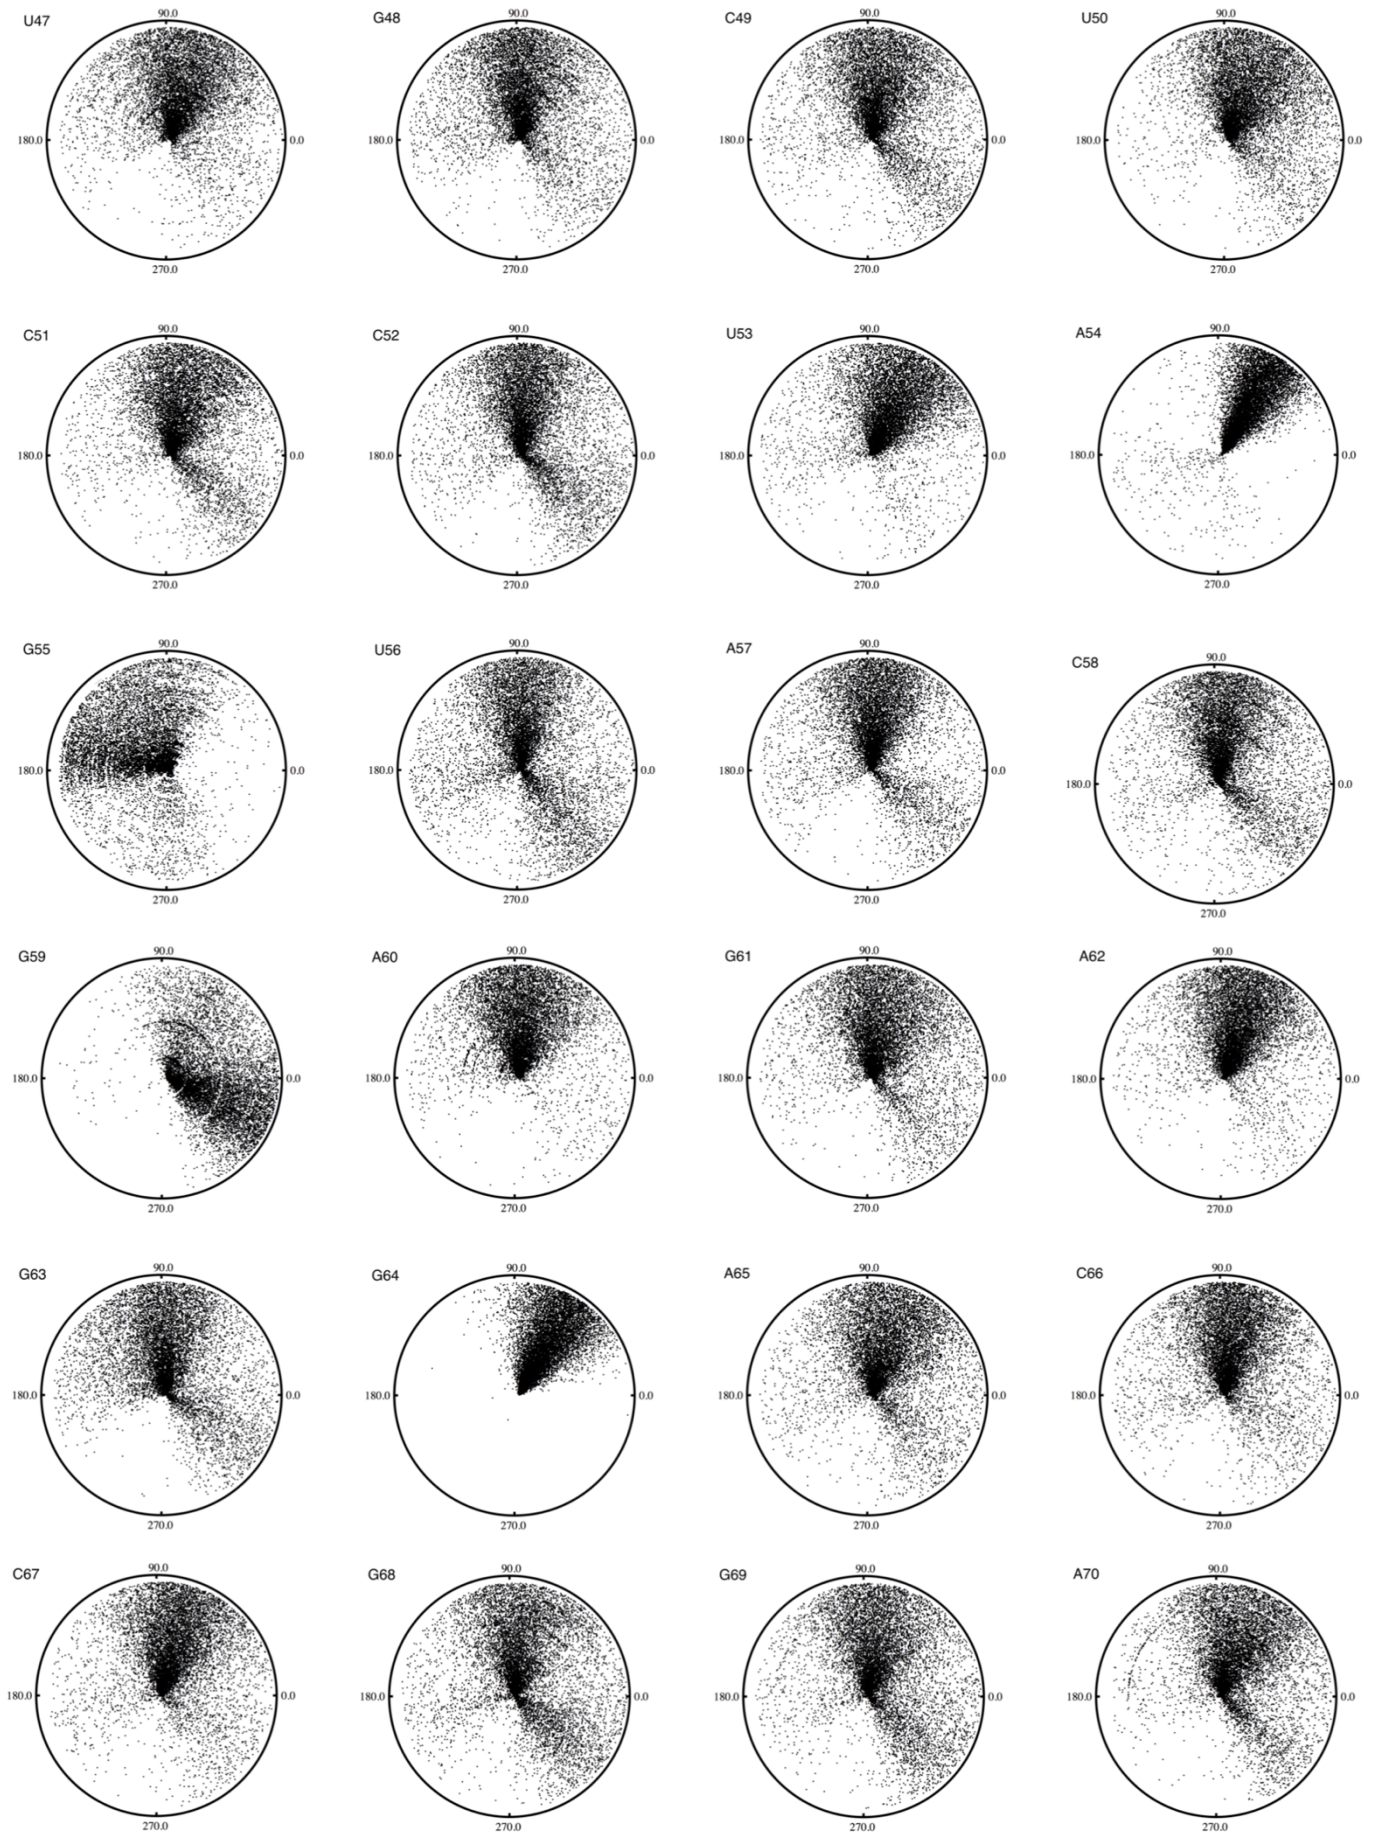

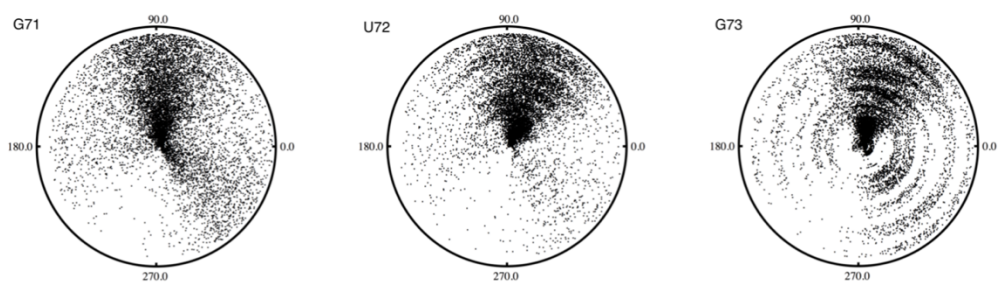

**Figure S2.** Polar coordinate plots of SRL  $\kappa$  angles in the MD simulations. The torsion angle value in degrees is displayed on the circle perimeter and the time axis is displayed along the circle radius, with  $t = 0$  at the origin and  $t = 10$  microseconds at the circle perimeter.

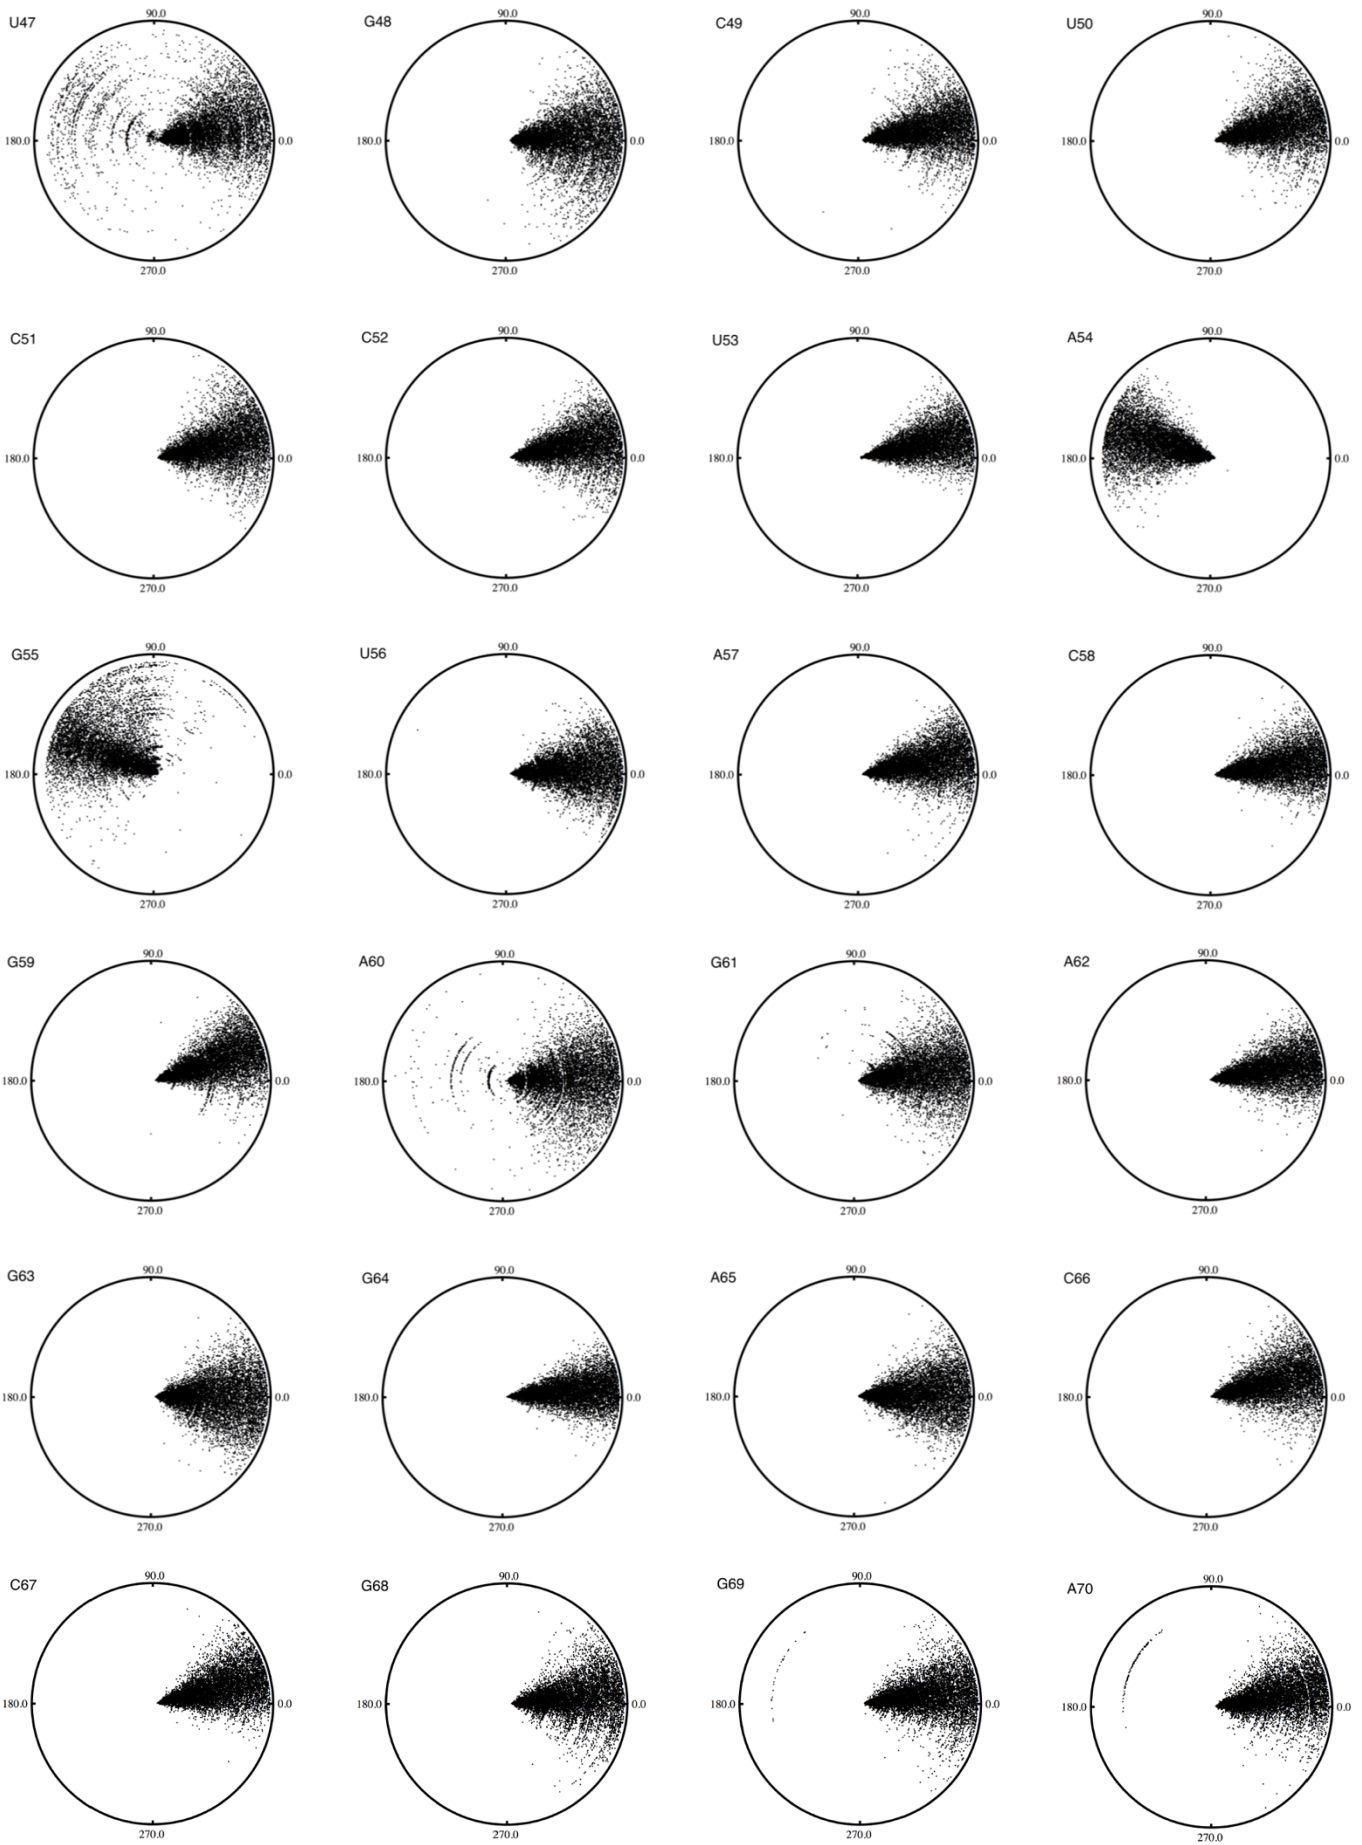

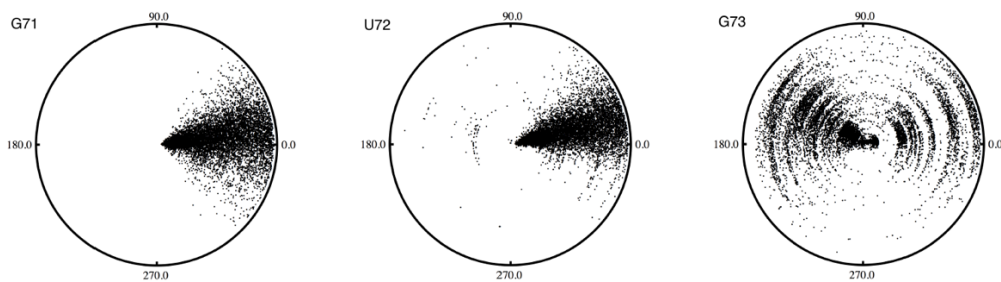

**Figure S3.** Polar coordinate plots of SRL sugar puckers (pseudorotation phase angle  $P$ ) in the MD simulations. The  $P$  angle value in degrees is displayed on the circle perimeter and the time axis is displayed along the radius, with  $t = 0$  at the origin and  $t = 10$  microseconds at the circle perimeter.



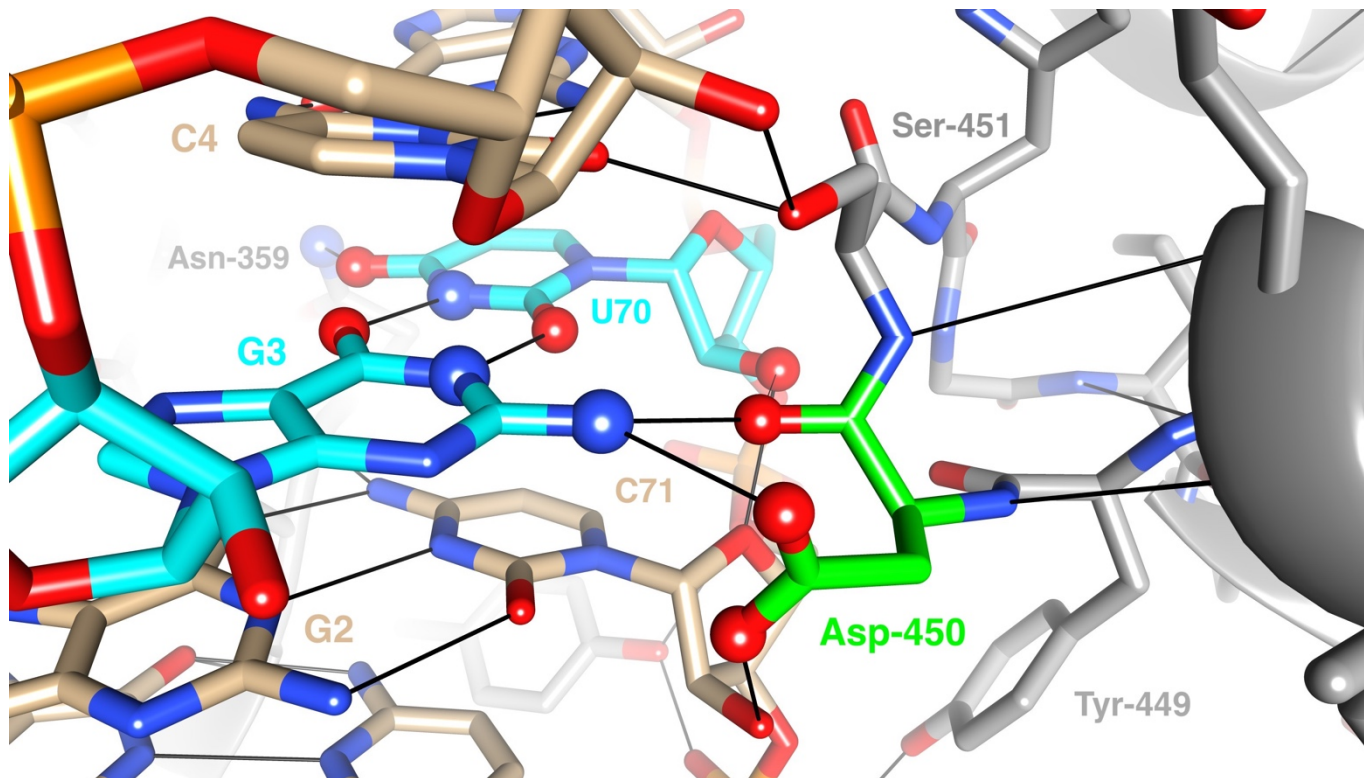

**Figure S4.** Close-up view of the G3•U70 pair (cyan carbon atoms) in the tRNA<sup>Ala</sup> acceptor stem contacted by the cognate alanyl-tRNA synthetase in the crystal structure of the complex from *Archaeoglobus fulgidus* (PDB ID 3WQY) (1). The water molecule bridging O2'(U) and N2(G) seen in the SRL crystal structure and MD simulations is displaced by the keto oxygen of Asp-450 (green carbon atoms) that also establishes a contact to the exocyclic amino group of G3 via its side chain. In the major groove Asn-359 uses its amide moiety to form an H-bond to O4 of U70 (background, left).

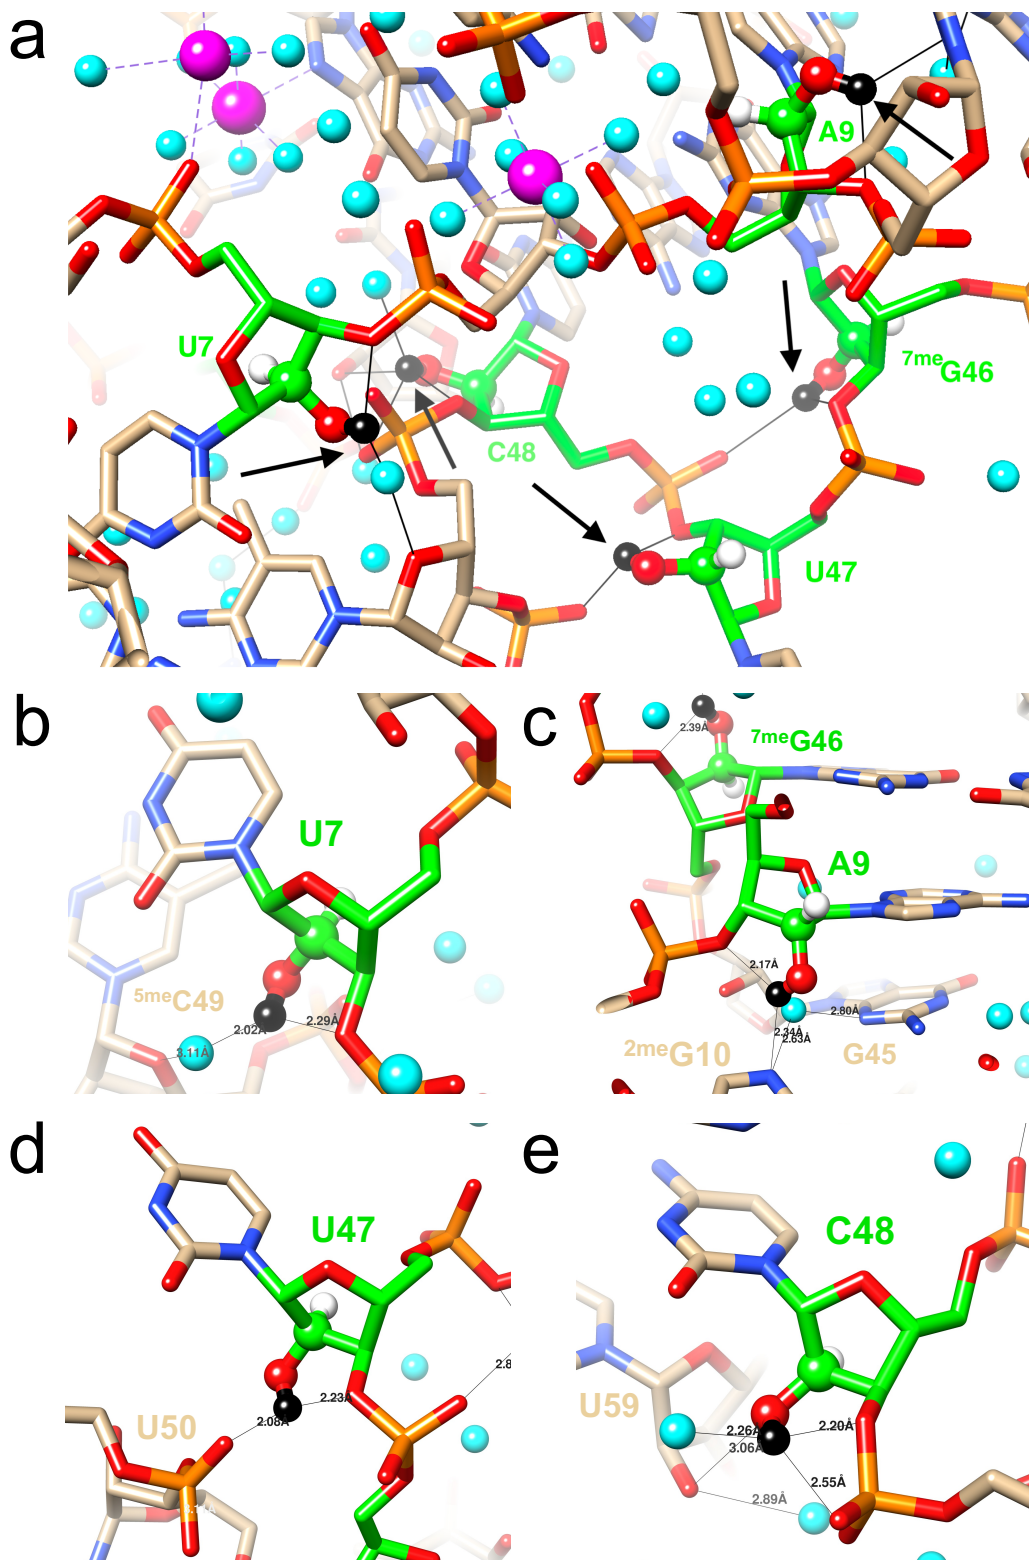

**Figure S5.** H-bonding interactions by 2'-hydroxyl groups of five ribonucleotides that adopt an unusual C2'-*endo* pucker (labeled and ribose carbon atoms highlighted in green) in the crystal structure of tRNA<sup>Phe</sup> at 1.92 Å resolution (PDB ID 1EHZ) (2). (a) Overall view and close-up views of (b) U7, (c) A9 and <sup>7me</sup>G46, (d) U47, and (e) C48. The positions of H2' and the HO2' hydrogen atoms were calculated in each case and

the  $\kappa$  angle H2'-C2'-O2'-HO2' (atoms shown in ball-and-stick mode and colored in white, green, red and black, respectively) was adjusted to +160°. In each case the 2'-OH donates in two or more H-bonds to neighboring oxygen and/or nitrogen acceptors (arrows). Water molecules and Mg<sup>2+</sup> ions are shown as spheres colored in cyan and magenta, respectively, the coordination sphere of metal ions is indicated by dashed lines, and H-bonds are drawn with thin solid lines with distances in Å (panels b-e).

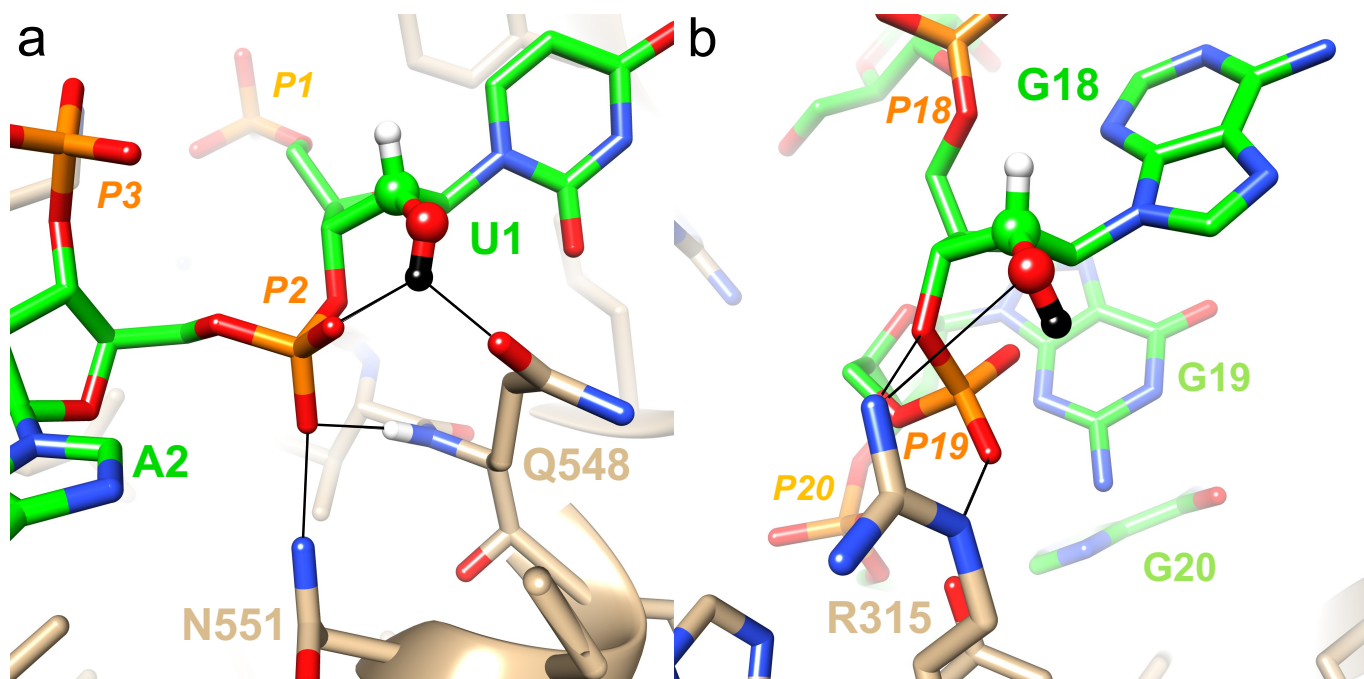

**Figure S6.** Nucleotides (a) U1 and (b) G18 adopt a C2'-*endo* pucker in the crystal structure of the Ago2:miR-20a complex at 2.25 Å resolution (PDB ID 4F3T) (3). The positions of H2' and the HO2' hydrogen atoms were calculated in each case and the  $\kappa$  angle H2'-C2'-O2'-HO2' (atoms shown in ball-and-stick mode and colored in white, green, red and black, respectively) was adjusted to +160°. Selected residues and phosphate groups are labeled and H-bonds are drawn with thin solid lines.

## References

1. Naganuma, M., Sekine, S., Chong, Y. E., Guo, M., Yang, X. L., Gamper, H., Hou, Y. M., Schimmel, P. and Yokoyama, S. (2014) The selective tRNA aminoacylation mechanism based on a single G.U pair. *Nature*, **510**: 507-511.
2. Shi, H. and Moore, P. B. (2000) The crystal structure of yeast phenylalanine tRNA at 1.93 Å resolution: a classic structure revisited. *RNA*, **6**, 1091-1105.
3. Elkayam, E., Kuhn, C. D., Tocilj, A., Haase, A. D., Greene, E. M., Hannon, G. J. and Joshua-Tor, L. (2012) The structure of human argonaute-2 in complex with miR-20a. *Cell*, **150**, 100-110.
